# Supplementary material for: Reproducibility of artificial intelligence models in computed tomography of the head: a quantitative analysis
Source: PubMed Central journal article supplement (PMC9613832; doi:10.1186/s13244-022-01311-7), 2022-10-27
Supplement: 13244_2022_1311_MOESM1_ESM.pdf [file 13244_2022_1311_MOESM1_ESM.pdf]

## ELECTRONIC SUPPLEMENTARY MATERIAL

### Reproducibility of artificial intelligence models in computed tomography of the head – a quantitative analysis

#### Data files

Data generated by the authors or analysed during the study are available at:

[https://github.com/FelixGunzer/Review\\_AI\\_CT\\_head](https://github.com/FelixGunzer/Review_AI_CT_head)

#### Tables

Table S1: List of articles

| Year | Purpose                                                                                                                                             | Main function  | Learning type | Reference (DOI)                 |
|------|-----------------------------------------------------------------------------------------------------------------------------------------------------|----------------|---------------|---------------------------------|
| 2003 | A three-dimensional classification of brain tissue densities based on a hierarchical artificial neural network                                      | Classification | CNN           | 10.1016/s0933-3657(03)00061-7   |
| 2009 | Kohonen Network for automatic point correspondence of unimodal medical images                                                                       | Detection      | SVM           | 10.1016/j.compbimed.2009.04.006 |
| 2010 | The aim of this study was to derive and validate a novel, automatic, adaptive, and robust algorithm                                                 | Segmentation   | -             | 10.1016/j.acra.2010.06.005      |
| 2012 | Dictionary learning algorithm for sparse representation of given data and suggest a way to apply this algorithm to 3-D medical image denoising      | Reconstruction | DL            | 10.1109/TBME.2011.2173935       |
| 2013 | In this paper, we propose a robust sparse perfusion deconvolution method to estimate cerebral blood flow in CTP performed at low radiation dose     | Quantification | DL            | 10.1016/j.media.2013.02.005     |
| 2014 | Prediction of spontaneous intracranial haemorrhage after intervention in stroke                                                                     | Prediction     | SVM           | 10.1016/j.nicl.2014.02.003      |
| 2014 | Develop an automated method for detection of the MCA dot sign of acute stroke on unenhanced CT images                                               | Detection      | SVM           | 10.1007/s12194-013-0234-1       |
| 2016 | Image fusion method that gives the fused image better contrast, more detail information, and suitable for clinical use                              | Fusion         | CNN           | 10.1007/s10278-015-9806-4       |
| 2016 | Novel algorithm for MRI image reconstruction from highly under-sampled MRI data and CT images                                                       | Reconstruction | DL            | 10.3233/XST-160540              |
| 2017 | Synthetic CT Generation                                                                                                                             | Generation     | CNN           | 10.1002/mp.12155                |
| 2017 | Evaluate the performance of an artificial intelligence tool using a deep learning algorithm for detecting hemorrhage, mass effect, or hydrocephalus | Detection      | CNN           | 10.1148/radiol.2017162664       |
| 2017 | To suppress the noise effectively while retain the structures well for low dose cone beam CT image                                                  | Reconstruction | DL            | 10.1109/TMI.2017.2759819        |

## Continuation of Table S1

| <i>Year</i> | <i>Purpose</i>                                                                                                                                                         | <i>Main function</i>       | <i>Learning type</i> | <i>Reference (DOI)</i>          |
|-------------|------------------------------------------------------------------------------------------------------------------------------------------------------------------------|----------------------------|----------------------|---------------------------------|
| 2017        | Radial Basis Functions Neural Network (RBFNN) based detection system, for automatic identification of Cerebral Vascular Accidents (CVA) through analysis of CT images  | Detection                  | RBFNN                | 10.1016/j.cmpb.2017.05.005      |
| 2018        | Stroke tissue outcome estimation                                                                                                                                       | Prediction                 | CNN                  | 10.3389/fneur.2018.00989        |
| 2018        | Reconstruction of synthetic CTs of CSF/Brain before and after surgery                                                                                                  | Reconstruction             | DL                   | 10.1109/TBME.2017.2783305       |
| 2018        | PET attenuation correction using pseudo CTs                                                                                                                            | Reconstruction             | CNN                  | 10.1186/s40658-018-0225-8       |
| 2018        | Automated deep-neural-network surveillance of cranial images for acute neurologic events                                                                               | Triage                     | CNN                  | 10.1038/s41591-018-0147-y       |
| 2018        | Propose a novel deformable registration method, which is based on a cue-aware deep regression network, to deal with multiple databases with minimal parameter tuning   | Registration               | CNN                  | 10.1109/TBME.2018.2822826       |
| 2018        | This study evaluates a convolutional neural network optimized for the detection and quantification of intracranial bleeding on noncontrast CT                          | Segmentation               | CNN                  | 10.3174/ajnr.A5742              |
| 2018        | Predict this risk of aneurysm rupture using a two-layer feed-forward artificial neural network                                                                         | Prediction                 | CNN                  | 10.1007/s00330-017-5300-3       |
| 2018        | Deep learning angiography method to generate 3D cerebral angiograms from a single contrast-enhanced C-arm conebeam CT acquisition                                      | Generation                 | CNN                  | 10.3174/ajnr.A5597              |
| 2018        | Generative adversarial approach                                                                                                                                        | Generation                 | CNN                  | 10.1109/TBME.2018.2814538       |
| 2018        | Elucidating the relationship between the number of CT images, including data concerning the accuracy of models and contrast enhancement for classifying the images     | Classification             | CNN                  | 10.1155/2018/1753480            |
| 2018        | MR-to-CT synthesis task by a novel deep embedding convolutional neural network                                                                                         | Generation                 | CNN                  | 10.1109/TBME.2018.2814538       |
| 2019        | Brain haemorrhage classification                                                                                                                                       | Classification             | CNN                  | 10.1155/2019/4629859            |
| 2019        | Brain haemorrhage classification                                                                                                                                       | Classification             | CNN                  | 10.3390/s19092167               |
| 2019        | Deep learning on the brain age estimation task                                                                                                                         | Prediction                 | CNN                  | 10.1016/j.mri.2019.06.018       |
| 2019        | Machine learning approach to categorise the degree of collateral flow in patients who were eligible for mechanical thrombectomy and generate an e-CTA collateral score | Classification, Generation | -                    | 10.1159/000500076               |
| 2019        | Deep learning of radiological image data for outcome prediction after endovascular treatment of patients with acute ischemic stroke                                    | Prediction                 | RF                   | 10.1016/j.compbimed.2019.103516 |

## Continuation of Table S1

| <i>Year</i> | <i>Purpose</i>                                                                                                                                                       | <i>Main function</i> | <i>Learning type</i> | <i>Reference (DOI)</i>        |
|-------------|----------------------------------------------------------------------------------------------------------------------------------------------------------------------|----------------------|----------------------|-------------------------------|
| 2019        | Fusion scheme for CT and MRI medical images based on CNNs and a dual-channel spiking cortical model                                                                  | Fusion               | CNN                  | 10.1007/s11517-018-1935-8     |
| 2019        | Investigate the clinical utility of using CNNs to calculate ventricular volume and explore limitations                                                               | Segmentation         | CNN                  | 10.1007/s11548-019-02038-5    |
| 2019        | A fully automated method that reliably computes acute intracranial lesions volume based on deep learning, cistern volume, and midline shift on noncontrast CT images | Segmentation         | CNN                  | 10.1089/neu.2018.6183         |
| 2019        | Automate ASPECTS to objectively score non-contrast CTs of acute ischaemic stroke patients                                                                            | Classification       | RF                   | 10.3174/ajnr.A5889            |
| 2019        | A learning-based approach to improve cone beam CT's image quality for extended clinical applications                                                                 | Generation           | RF                   | 10.1002/mp.13295              |
| 2019        | Deep learning method to accurately reconstruct images for previously solved and unsolved CT reconstruction problems with high quantitative accuracy                  | Reconstruction       | CNN                  | 10.1109/TMI.2019.2910760      |
| 2019        | Genetic Algorithm-based network evolution approach to search for the fittest genes to optimize network structures automatically                                      | Reconstruction       | CNN                  | 10.1016/j.media.2019.03.004   |
| 2019        | Dictionary learning-based method to segment the brain surface in post-surgical CT images of epilepsy patients following surgical implantation of electrodes          | Segmentation         | DL                   | 10.1109/TMI.2018.2868045      |
| 2019        | Deep-learning model trained to map projection radiographs to the corresponding 3D anatomy can subsequently generate volumetric tomographic X-ray images              | Generation           | CNN                  | 10.1038/s41551-019-0466-4     |
| 2019        | Machine learning-based method that evaluates for large vessel occlusion and ischemic core volume in patients using CT angiography                                    | Detection            | CNN                  | 10.1161/STROKEAHA.119.026189  |
| 2019        | CNN multiplane approach and compare it to single-plane prediction of synthetic CT by using the real CT as ground truth                                               | Prediction           | CNN                  | 10.1016/j.ijrobp.2019.06.2535 |
| 2019        | Deep learning-based method to automatically segment arterio-venous malformations on CT simulation image sets                                                         | Segmentation         | CNN                  | 10.1002/mp.13560              |
| 2019        | Butterfly network to perform the image domain dual material decomposition                                                                                            | Prediction           | CNN                  | 10.1002/mp.13489              |
| 2020        | Brain haemorrhage detection and segmentation                                                                                                                         | Segmentation         | CNN                  | 10.1109/JBHI.2020.3028243     |

## Continuation of Table S1

| <i>Year</i> | <i>Purpose</i>                                                                                                                                                                      | <i>Main function</i>     | <i>Learning type</i> | <i>Reference (DOI)</i>        |
|-------------|-------------------------------------------------------------------------------------------------------------------------------------------------------------------------------------|--------------------------|----------------------|-------------------------------|
| 2020        | Quantification of chronic ischaemic changes in acute stroke patients regarding outcome                                                                                              | Segmentation, Prediction | SVM                  | 10.3389/fneur.2020.00015      |
| 2020        | Classify between neoplastic and non-neoplastic intracranial haemorrhage                                                                                                             | Prediction               | RF                   | 10.3389/fneur.2020.00285      |
| 2020        | Evaluating the impact of key parameters on the pseudo CT quality generated from MRI with a 3D convolutional neural network                                                          | Classification           | CNN                  | 10.1016/j.ijrobp.2020.05.006  |
| 2020        | A deep learning method applying convolutional neural networks with deep supervision for accurate hematoma segmentation and volume quantification in CT scans                        | Segmentation             | CNN                  | 10.1038/s41598-020-76459-7    |
| 2020        | Employ machine learning algorithms to combine statistical shape information with expert ratings to generate a novel objective method of measuring the severity of metopic CS        | Quantification           | na                   | 10.1097/SCS.00000000000006215 |
| 2020        | Predict individual rupture status of unruptured intracranial aneurysms (UIAs)                                                                                                       | Prediction               | RF, SVM              | 10.1007/s00330-020-06886-7    |
| 2020        | Use of deep learning techniques with CT angiography acquired from multiple medical centers and different machines to develop and evaluate an automatic detection model              | Detection                | CNN                  | 10.1007/s11548-020-02121-2    |
| 2020        | Medical image fusion method which combines CNNs and non-subsampled shearlet transform (NSST) to simultaneously cover the advantages of them both                                    | Fusion                   | CNN                  | 10.1155/2020/6265708          |
| 2020        | Validate a fully automated segmentation algorithm for volumetric analysis of perihematoma edema                                                                                     | Segmentation             | CNN                  | 10.1161/STROKEAHA.119.026764  |
| 2020        | Prediction model to identify patients in need of a non-contrast head CT exam during emergency department triage.                                                                    | Triage                   | RF                   | 10.1007/s00234-019-02293-y    |
| 2020        | Apply deep learning methods to segment cerebral arteries on non-contrast CT scans and generate angiographies without the need for contrast administration                           | Segmentation, Generation | CNN                  | 10.1371/journal.pone.0237092  |
| 2020        | Deep learning method for generating virtual noncontrast CT images from contrast-enhanced CT images and evaluate its performance in dose calculations for head and neck radiotherapy | Generation               | CNN                  | 10.1002/mp.13925              |

Continuation of Table S1

| <i>Year</i> | <i>Purpose</i>                                                                                                                                                                                                       | <i>Main function</i>       | <i>Learning type</i> | <i>Reference (DOI)</i>        |
|-------------|----------------------------------------------------------------------------------------------------------------------------------------------------------------------------------------------------------------------|----------------------------|----------------------|-------------------------------|
| 2020        | Use of typical networks of supervised and unsupervised deep learning methods, respectively, to transform MR/CT images to their counterpart modality                                                                  | Fusion                     | CNN                  | 10.1155/2020/5193707          |
| 2020        | Assessing the feasibility of dose calculations from MRI acquired with a heterogeneous set of imaging protocol for paediatric patients affected by brain tumours                                                      | Generation                 | CNN                  | 10.1016/j.radonc.2020.09.029  |
| 2020        | Intracranial pressure based decision making: Prediction of suspected increased intracranial pressure with machine learning                                                                                           | Prediction                 | -                    | 10.1371/journal.pone.0240845  |
| 2020        | Deep learning to reliably and efficiently quantify and detect different lesion types in traumatic brain injuries                                                                                                     | Triage                     | CNN                  | 10.1016/S2589-7500(20)30085-6 |
| 2020        | Detect and quantitate infarction by using non-contrast-enhanced CT scans in patients with AIS                                                                                                                        | Segmentation               | CNN, RF              | 10.1148/radiol.2020191193     |
| 2020        | A deep neural network learns to predict the final infarct volume directly from the native CTP images and metadata such as the time parameters and treatment                                                          | Classification, Prediction | CNN                  | 10.1016/j.media.2019.101589   |
| 2020        | Deep learning model to automatically detect and segment aneurysms in patients with acute subarachnoidal haemorrhage on CT angiography                                                                                | Segmentation               | CNN                  | 10.1038/s41598-020-78384-1    |
| 2020        | CNN to detect large vessel occlusions at multiphase CT angiography                                                                                                                                                   | Detection                  | CNN                  | 10.1148/radiol.2020200334     |
| 2020        | Examine the feasibility of deep learning techniques to convert MRI ultrashort TE images directly to synthetic CT of the skull images for use in transcranial MR imaging-guided focused ultrasound treatment planning | Generation                 | CNN                  | 10.3174/ajnr.A6758            |
| 2020        | Deep learning-based CNN is proposed for prediction of globe contours and their subsequent volume quantification in CT images of the orbits                                                                           | Prediction                 | CNN                  | 10.3174/ajnr.A6538            |
| 2020        | Bidirectional convolutional LSTM (C-LSTM) network to predict 3D volumes from 4D spatiotemporal data                                                                                                                  | Prediction                 | CNN                  | 10.1109/TMI.2019.2939044      |

Continuation of Table S1

| <i>Year</i> | <i>Purpose</i>                                                                                                                                                                                                                                | <i>Main function</i> | <i>Learning type</i>                           | <i>Reference (DOI)</i>         |
|-------------|-----------------------------------------------------------------------------------------------------------------------------------------------------------------------------------------------------------------------------------------------|----------------------|------------------------------------------------|--------------------------------|
| 2020        | Combine clinical, radiomic, and quantified radiation therapy plan information for prediction of locoregional failure in head and neck cancer                                                                                                  | Prediction           | RF, CNN, Logistic Regression, Isolation Forest | 10.1016/j.ejmp.2020.01.027     |
| 2020        | Medical image fusion method based on the imaging characteristics of medical images                                                                                                                                                            | Fusion               | CNN                                            | 10.1155/2020/3290136           |
| 2021        | We determined the accuracy of RAPID ICH for ICH detection and ICH volumetric quantification on NCCT.                                                                                                                                          | Detection            | CNN                                            | 10.3174/ajnr.A6926             |
| 2021        | A framework that creates synthetic data, generates ground truth data, registers multimodal images in an accurate and fast manner, and automatically classifies the image modality so that the process of registration can be fully automated. | Registration         | CNN                                            | 10.1038/s41598-021-81044-7     |
| 2021        | Compare the image quality of brain CT images reconstructed with deep learning-based image reconstruction and adaptive statistical iterative reconstruction-Veo.                                                                               | Reconstruction       | CNN                                            | 10.1007/s00234-020-02574-x     |
| 2021        | Compared the added value of cuboid RF to predict the final infarct                                                                                                                                                                            | Prediction           | CNN, RF                                        | 10.1177/0271678X20924549       |
| 2021        | U-net based deep learning framework to automatically detect and segment hemorrhage strokes in CT brain images.                                                                                                                                | Detection            | CNN                                            | 10.1109/JBHI.2020.3028243      |
| 2021        | U-Net model to perform conversions between different kV CT images                                                                                                                                                                             | Reconstruction       | CNN                                            | 10.1007/s10278-020-00414-1     |
| 2021        | Deep learning algorithms to measure ventricular and cranial vault volumes in a large dataset of head CT scans                                                                                                                                 | Segmentation         | CNN                                            | 10.1016/j.wneu.2020.12.148     |
| 2021        | Algorithm to decrease time-to-treatment, leading to improved clinical outcomes                                                                                                                                                                | Triage               | CNN                                            | 10.1159/000515320              |
| 2021        | CNN to predict the deformed left and right hemispheres                                                                                                                                                                                        | Prediction           | CNN                                            | 10.1016/j.jneumeth.2020.109033 |
| 2021        | Deep neural networks trained with an appropriate anatomic context in the network receptive field, can effectively perform ICH segmentation                                                                                                    | Segmentation         | CNN                                            | 10.1007/s12021-020-09493-5     |
| 2021        | CNN to generate the sCT in brain site and evaluate the dosimetry accuracy                                                                                                                                                                     | Generation           | CNN                                            | 10.1002/acm2.13176             |
| 2021        | Evaluate the association between perihematoma radiomics features and hematoma expansion                                                                                                                                                       | Prediction           | SVM                                            | 10.1016/j.crad.2021.03.003     |

Continuation of Table S1

| Year | Purpose                                                                                                                                 | Main function | Learning type | Reference (DOI)                 |
|------|-----------------------------------------------------------------------------------------------------------------------------------------|---------------|---------------|---------------------------------|
| 2021 | A paired-unpaired Unsupervised Attention Guided Generative Adversarial Network model to translate MR images to CT images and vice versa | Generation    | CNN           | 10.1016/j.combiomed.2021.104763 |
| 2021 | Validation of an artificial intelligence solution for acute triage and rule-out normal of non-contrast CT head scans                    | Triage        | CNN           | 10.1007/s00234-021-02826-4      |
| 2021 | A radiomics-clinical model to predict intraventricular hemorrhage growth after spontaneous intracerebral hematoma                       | Prediction    | SVM           | 10.18632/aging.202954           |

CNN - convolutional neuronal network; CT - computed tomography; CTP - computed tomography perfusion; DL - dictionary learning; MCA - middle cerebral artery; MRI - magnetic resonance imaging; RF - random forest; SVM - support vector machine; n = 83

Table S2: Prevalence rates of lesions, diseases or other pathologies

| Evidence                                                                                                             | Prevalence rates |          |            | Reference (DOI)                                              |
|----------------------------------------------------------------------------------------------------------------------|------------------|----------|------------|--------------------------------------------------------------|
|                                                                                                                      | Training set     | Test set | Real world |                                                              |
| Prevalence of sICH after tPA in a systematic meta-analysis                                                           | 0.1415           | 0.1      | 0.06       | 10.1016/S0140-6736(12)60738-7                                |
| Prevalence of traumatic SAH in multicentre study of 750 patients of moderate to severe TBI                           | 0.441            | 0.441    | 0.41       | 10.1097/00006123-200202000-00006                             |
| Prevalence of traumatic SDH with severe TBI                                                                          | 0.168            | 0.168    | 0.11       | 10.1227/01.Neu.0000210364.20290.C9, 10.1111/jgs.16400        |
| Prevalence of traumatic IPH in 2875 elderly patients after fall                                                      | 0.241            | 0.241    | 0.069      | 10.1111/jgs.16400                                            |
| Prevalence of ICH in 50 patients with intracranial brain tumour                                                      | 0.351            | 0.351    | 0.024      | 10.1007/s007010070052                                        |
| Prevalence of ICB in 3088 Pat. with CT admitted to ED after mild TBI                                                 | 0.377            | 0.415    | 0.048      | 10.1155/2013/453978                                          |
| Prevalence of hydrocephalus in 2498 patients getting a CT with headaches                                             | 0.158            | 0.158    | 0.13       | 10.1177/1971400915602801                                     |
| Prevalence of Stroke in 539 patients being admitted to Acute Stroke Unit                                             | 0.302            | 0.429    | 0.9        | 10.1136/emered-2014-204392                                   |
| Prevalence of ICB in 3088 Pat. with CT admitted to ED after mild TBI                                                 | 0.15             | 0.15     | 0.048      | 10.1155/2013/453978                                          |
| Prevalence of ICH in pat with haemorrhagic stroke (calculated from overall incidence of haemorrhagic stroke and ICH) | 0.4              | 0.3      | 0.54       | 10.1016/S0733-8619(05)70200-0, 10.1016/S0140-6736(15)60692-4 |
| Proportion of IVH in patients with haemorrhagic stroke                                                               | 0.4              | 0.3      | 0.45       | 10.1007/s11910-010-0086-6                                    |
| Prevalence of ICB in 3088 Pat. with CT admitted to ED after mild TBI                                                 | 0.081            | 0.12     | 0.048      | 10.1155/2013/453978                                          |

## Continuation of Table S2

| <i>Evidence statement</i>                                                                                            | <i>Training set</i> | <i>Test set</i> | <i>Real world</i> | <i>Reference (DOI)</i>                                       |
|----------------------------------------------------------------------------------------------------------------------|---------------------|-----------------|-------------------|--------------------------------------------------------------|
| Proportion of prevalence unruptured intracranial aneurysms (UIA) in a systematic meta-analysis of 68 studies         | 0.8                 | 0.49            | 0.016             | 10.1016/S1474-4422(11)70109-0, 10.1016/S1042-3680(18)30247-X |
| Prevalence of unruptured intracranial aneurysms (UIA) in a systematic meta-analysis of 68 studies                    | 1                   | 1               | 0.032             | 10.1016/S1474-4422(11)70109-0                                |
| Prevalence of traumatic SDH with severe TBI                                                                          | 0.4                 | 0.4             | 0.11              | 10.1227/01.Neu.0000210364.29290.C9, 10.1111/jgs.16400        |
| Prevalence of EDH in patients with TBI in a review                                                                   | 0.41                | 0.41            | 0.04              | 10.1227/01.Neu.0000210364.29290.C9                           |
| Prevalence of ICB in 3088 Pat. with CT admitted to ED after mild TBI                                                 | 0.63                | 0.63            | 0.048             | 10.1155/2013/453978                                          |
| Proportion of prevalence of unruptured intracranial aneurysms (UIA) in a systematic meta-analysis of 68 studies      | 0.09                | 0.09            | 0.016             | 10.1016/S1474-4422(11)70109-0, 10.1016/S1042-3680(18)30247-X |
| Prevalence of traumatic SDH with severe TBI                                                                          | 0.37                | 0.11            | 0.11              | 10.1227/01.Neu.0000210364.29290.C9, 10.1111/jgs.16400        |
| Prevalence of EDH in patients with TBI in a review                                                                   | 0.48                | 0.44            | 0.04              | 10.1227/01.Neu.0000210364.29290.C9                           |
| Prevalence of traumatic SAH in multicentre study of 750 patients of moderate to severe TBI                           | 0.74                | 0.61            | 0.41              | 10.1097/00006123-200202000-00006                             |
| Prevalence of traumatic IVH                                                                                          | 0.22                | 0.17            | 0.014             | 10.1097/01.ta.0000218038.28064.9d                            |
| Prevalence of ICB in 3088 Pat. with CT admitted to ED after mild TBI                                                 | 0.67                | 0.44            | 0.048             | 10.1155/2013/453978                                          |
| Prevalence of Stroke in 539 patients being admitted to Acute Stroke Unit                                             | 1                   | 1               | 0.9               | 10.1136/emered-2014-204392                                   |
| Proportion of prevalence of unruptured intracranial aneurysms (UIA) in a systematic meta-analysis of 68 studies      | 1                   | 1               | 0.016             | 10.1016/S1474-4422(11)70109-0, 10.1016/S1042-3680(18)30247-X |
| Prevalence of Stroke in 539 patients being admitted to Acute Stroke Unit                                             | 0.754               | 0.754           | 0.9               | 10.1136/emered-2014-204392                                   |
| Proportion of LVO of prevalence of Stroke in 539 patients being admitted to Acute Stroke Unit                        | 0.8                 | 0.8             | 0.126             | 10.1093/neuros/nyz067, 10.1136/emered-2014-204392            |
| Proportion of LVO of prevalence of Stroke in 539 patients being admitted to Acute Stroke Unit                        | 0.5                 | 0.5             | 0.126             | 10.1093/neuros/nyz067, 10.1136/emered-2014-204392            |
| Prevalence of MCA dot sign in 100 patients with stroke                                                               | 1                   | 1               | 0.16              | 10.1161/01.STR.32.1.84                                       |
| Prevalence of ICH in pat with haemorrhagic stroke (calculated from overall incidence of haemorrhagic stroke and ICH) | 1                   | 1               | 0.54              | 10.1016/S0733-8619(05)70200-0, 10.1016/S0140-6736(15)60692-4 |

The prevalence outcome rates described in demographic statistics for training sets, test sets or from real world epidemiology data can be found below. CT-computed tomography; ED - emergency department; EDH - epidural haemorrhage; ICB - intracranial bleeding; ICH - intracerebral haemorrhage; IPH - intraparenchymal haemorrhage; IVH - intraventricular haemorrhage; LVO - large vessel occlusion; MCA - middle cerebral artery; SAH - subarachnoid haemorrhage; SDH - subdural haemorrhage; sICH - spontaneous intracerebral haemorrhage; TBI - traumatic brain injury; tPA - tissue plasminogen activator; UIA - unruptured intracranial aneurysm; n = 28



Table S3: List of variables and outcomes

| Feature                         |
|---------------------------------|
| Year                            |
| Purpose                         |
| Main function of algorithm      |
| Graphical illustrations         |
| Data source                     |
| Code open source                |
| Size dataset                    |
| Dimension/Resolution Input      |
| Colour space (Hounsfield Units) |
| Augmentation                    |
| Train/Validation split          |
| Test holdout                    |
| External test set               |
| Prevalence training set         |
| Prevalence test set             |
| Prevalence reality              |
| Algorithm                       |
| Network                         |
| Epochs                          |
| Learning rate                   |
| Batch size                      |
| Dropout                         |
| Optimisation method             |
| Loss of function                |
| Hardware                        |
| Preprocessing steps             |
| Ground truth                    |
| Metrics of performance          |
| Comparison to                   |

A list of all features for which data were sought.

Table S4: Measurements of performance in comparison to different classes of machine learning models

| Measurement of performance | Class of paper |           |            |              |                |           |           |            |                |
|----------------------------|----------------|-----------|------------|--------------|----------------|-----------|-----------|------------|----------------|
|                            | Classification | Detection | Prediction | Segmentation | Reconstruction | Triage    | Fusion    | Generation | Quantification |
| AUROC                      | 1 (7.14)       | 3 (11.11) | 10 (26.32) | 3 (7.89)     | -              | 3 (33.33) | -         | -          | 1 (25.00)      |
| Accuracy                   | 2 (14.29)      | 2 (7.41)  | 1 (2.63)   | -            | -              | -         | -         | 2 (6.45)   | -              |
| Precision / PPV            | 2 (14.29)      | 2 (7.41)  | 4 (10.52)  | 4 (10.53)    | -              | -         | -         | 1 (3.23)   | -              |
| Sensitivity / Recall       | 2 (14.29)      | 9 (33.33) | 5 (13.16)  | 7 (18.42)    | -              | 2 (22.22) | -         | 2 (6.45)   | -              |
| Specificity                | 2 (14.29)      | 8 (29.63) | 3 (7.89)   | 6 (15.79)    | -              | 2 (22.22) | -         | 2 (6.45)   | -              |
| NPV                        | -              | 1 (3.70)  | 2 (5.26)   | 1 (2.63)     | -              | -         | -         | -          | -              |
| Dice score / F1 score      | 2 (14.29)      | 1 (3.70)  | 5 (13.16)  | 11 (28.95)   | -              | 1 (11.11) | -         | 4 (12.90)  | -              |
| R2                         | -              | -         | 1 (2.63)   | 2 (5.26)     | -              | -         | -         | -          | -              |
| PSNR                       | -              | 2         | -          | -            | 2 (20.00)      | -         | 1 (14.29) | 6 (19.36)  | 1 (25.00)      |
| SSIM                       | -              | -         | 1 (2.63)   | -            | 2 (20.00)      | -         | 3 (42.86) | -          | -              |
| (R)MSE                     | -              | 1 (3.70)  | 1 (2.63)   | -            | -              | -         | -         | 4 (12.90)  | 1 (25.00)      |
| MAE                        | -              | -         | 2 (5.26)   | 3 (7.89)     | -              | -         | 1 (14.29) | 7 (22.58)  | -              |
| others                     | 1 (7.14)       | -         | 3 (7.89)   | 1 (2.63)     | 6 (60.00)      | 1 (11.11) | 2 (28.57) | 1 (3.23)   | 1 (25.00)      |

AUROC - area under the receiver operating characteristic curve; MAE - mean absolute error; others - not defined or uncommon metrics not being listed here; PPV - positive predictive value; NPV - negative predictive value; PSNR - peak signal-to-noise ratio; R2 - R-squared score; (R)MSE - (root) mean squared error; SSIM - structural similarity index; n = 83

| Section and Topic             | Item # | Checklist item                                                                                                                                                                                                                                                                                       | Location where item is reported |
|-------------------------------|--------|------------------------------------------------------------------------------------------------------------------------------------------------------------------------------------------------------------------------------------------------------------------------------------------------------|---------------------------------|
| <b>TITLE</b>                  |        |                                                                                                                                                                                                                                                                                                      |                                 |
| Title                         | 1      | Identify the report as a systematic review.                                                                                                                                                                                                                                                          | Title                           |
| <b>ABSTRACT</b>               |        |                                                                                                                                                                                                                                                                                                      |                                 |
| Abstract                      | 2      | See the PRISMA 2020 for Abstracts checklist.                                                                                                                                                                                                                                                         | Abstract                        |
| <b>INTRODUCTION</b>           |        |                                                                                                                                                                                                                                                                                                      |                                 |
| Rationale                     | 3      | Describe the rationale for the review in the context of existing knowledge.                                                                                                                                                                                                                          | pp. 1-2                         |
| Objectives                    | 4      | Provide an explicit statement of the objective(s) or question(s) the review addresses.                                                                                                                                                                                                               | p. 2                            |
| <b>METHODS</b>                |        |                                                                                                                                                                                                                                                                                                      |                                 |
| Eligibility criteria          | 5      | Specify the inclusion and exclusion criteria for the review and how studies were grouped for the syntheses.                                                                                                                                                                                          | pp.2-4                          |
| Information sources           | 6      | Specify all databases, registers, websites, organisations, reference lists and other sources searched or consulted to identify studies. Specify the date when each source was last searched or consulted.                                                                                            | p.2-3                           |
| Search strategy               | 7      | Present the full search strategies for all databases, registers and websites, including any filters and limits used.                                                                                                                                                                                 | p.2-3                           |
| Selection process             | 8      | Specify the methods used to decide whether a study met the inclusion criteria of the review, including how many reviewers screened each record and each report retrieved, whether they worked independently, and if applicable, details of automation tools used in the process.                     | p.3-4                           |
| Data collection process       | 9      | Specify the methods used to collect data from reports, including how many reviewers collected data from each report, whether they worked independently, any processes for obtaining or confirming data from study investigators, and if applicable, details of automation tools used in the process. | p.3                             |
| Data items                    | 10a    | List and define all outcomes for which data were sought. Specify whether all results that were compatible with each outcome domain in each study were sought (e.g. for all measures, time points, analyses), and if not, the methods used to decide which results to collect.                        | Supplements                     |
|                               | 10b    | List and define all other variables for which data were sought (e.g. participant and intervention characteristics, funding sources). Describe any assumptions made about any missing or unclear information.                                                                                         | Supplements                     |
| Study risk of bias assessment | 11     | Specify the methods used to assess risk of bias in the included studies, including details of the tool(s) used, how many reviewers assessed each study and whether they worked independently, and if applicable, details of automation tools used in the process.                                    | GRADE                           |
| Effect measures               | 12     | Specify for each outcome the effect measure(s) (e.g. risk ratio, mean difference) used in the synthesis or presentation of results.                                                                                                                                                                  | p.GRADE                         |
| Synthesis methods             | 13a    | Describe the processes used to decide which studies were eligible for each synthesis (e.g. tabulating the study intervention characteristics and comparing against the planned groups for each synthesis (item #5)).                                                                                 | pp.3-4                          |
|                               | 13b    | Describe any methods required to prepare the data for presentation or synthesis, such as handling of missing summary statistics, or data conversions.                                                                                                                                                | R script                        |
|                               | 13c    | Describe any methods used to tabulate or visually display results of individual studies and syntheses.                                                                                                                                                                                               | R script                        |
|                               | 13d    | Describe any methods used to synthesize results and provide a rationale for the choice(s). If meta-analysis was performed, describe the model(s), method(s) to identify the presence and extent of statistical heterogeneity, and software package(s) used.                                          | R script                        |
|                               | 13e    | Describe any methods used to explore possible causes of heterogeneity among study results (e.g. subgroup analysis, meta-regression).                                                                                                                                                                 | R script                        |
|                               | 13f    | Describe any sensitivity analyses conducted to assess robustness of the synthesized results.                                                                                                                                                                                                         | R script                        |
| Reporting bias assessment     | 14     | Describe any methods used to assess risk of bias due to missing results in a synthesis (arising from reporting biases).                                                                                                                                                                              | GRADE                           |
| Certainty assessment          | 15     | Describe any methods used to assess certainty (or confidence) in the body of evidence for an outcome.                                                                                                                                                                                                | GRADE                           |

| Section and Topic                              | Item # | Checklist item                                                                                                                                                                                                                                                                       | Location where item is reported |
|------------------------------------------------|--------|--------------------------------------------------------------------------------------------------------------------------------------------------------------------------------------------------------------------------------------------------------------------------------------|---------------------------------|
| <b>RESULTS</b>                                 |        |                                                                                                                                                                                                                                                                                      |                                 |
| Study selection                                | 16a    | Describe the results of the search and selection process, from the number of records identified in the search to the number of studies included in the review, ideally using a flow diagram.                                                                                         | Figure 1                        |
|                                                | 16b    | Cite studies that might appear to meet the inclusion criteria, but which were excluded, and explain why they were excluded.                                                                                                                                                          | Figure 1                        |
| Study characteristics                          | 17     | Cite each included study and present its characteristics.                                                                                                                                                                                                                            | Supplementals                   |
| Risk of bias in studies                        | 18     | Present assessments of risk of bias for each included study.                                                                                                                                                                                                                         | GRADE                           |
| Results of individual studies                  | 19     | For all outcomes, present, for each study, (a) summary statistics for each group (where appropriate) and (b) an effect estimate and its precision (e.g. confidence/credible interval), ideally using structured tables or plots.                                                     | pp. 4-6                         |
| Results of syntheses                           | 20a    | For each synthesis, briefly summarise the characteristics and risk of bias among contributing studies.                                                                                                                                                                               | GRADE                           |
|                                                | 20b    | Present results of all statistical syntheses conducted. If meta-analysis was done, present for each the summary estimate and its precision (e.g. confidence/credible interval) and measures of statistical heterogeneity. If comparing groups, describe the direction of the effect. | pp.4-6                          |
| Reporting biases                               | 20c    | Present results of all investigations of possible causes of heterogeneity among study results.                                                                                                                                                                                       | GRADE                           |
|                                                | 20d    | Present results of all sensitivity analyses conducted to assess the robustness of the synthesized results.                                                                                                                                                                           | GRADE                           |
| Certainty of evidence                          | 21     | Present assessments of risk of bias due to missing results (arising from reporting biases) for each synthesis assessed.                                                                                                                                                              | GRADE                           |
|                                                | 22     | Present assessments of certainty (or confidence) in the body of evidence for each outcome assessed.                                                                                                                                                                                  | GRADE                           |
| <b>DISCUSSION</b>                              |        |                                                                                                                                                                                                                                                                                      |                                 |
| Discussion                                     | 23a    | Provide a general interpretation of the results in the context of other evidence.                                                                                                                                                                                                    | pp. 7-8                         |
|                                                | 23b    | Discuss any limitations of the evidence included in the review.                                                                                                                                                                                                                      | p. 8                            |
|                                                | 23c    | Discuss any limitations of the review processes used.                                                                                                                                                                                                                                | p. 8                            |
|                                                | 23d    | Discuss implications of the results for practice, policy, and future research.                                                                                                                                                                                                       | p. 8                            |
| <b>OTHER INFORMATION</b>                       |        |                                                                                                                                                                                                                                                                                      |                                 |
| Registration and protocol                      | 24a    | Provide registration information for the review, including register name and registration number, or state that the review was not registered.                                                                                                                                       | p.2                             |
|                                                | 24b    | Indicate where the review protocol can be accessed, or state that a protocol was not prepared.                                                                                                                                                                                       | p.2-3                           |
|                                                | 24c    | Describe and explain any amendments to information provided at registration or in the protocol.                                                                                                                                                                                      | p.2-3                           |
| Support                                        | 25     | Describe sources of financial or non-financial support for the review, and the role of the funders or sponsors in the review.                                                                                                                                                        | p. 9                            |
|                                                | 26     | Declare any competing interests of review authors.                                                                                                                                                                                                                                   | p. 9                            |
| Availability of data, code and other materials | 27     | Report which of the following are publicly available and where they can be found: template data collection forms; data extracted from included studies; data used for all analyses; analytic code; any other materials used in the review.                                           | p. 9                            |

From: Page MJ, McKenzie JE, Bossuyt PM, Boutron I, Hoffmann TC, Mulrow CD, et al. The PRISMA 2020 statement: an updated guideline for reporting systematic reviews. *BMJ* 2021;372:n71. doi: 10.1136/bmj.n71

For more information, visit: <http://www.prisma-statement.org/>
